# Supplementary material for: Differentiation of snake venom using Raman spectroscopic analysis
Source: Royal Society of Chemistry journal article supplement (doi:10.1039/d3tb00829k), 2023-01-01
Supplement: d3tb00829k1.pdf [file d3tb00829k1.pdf]

### Supplementary information

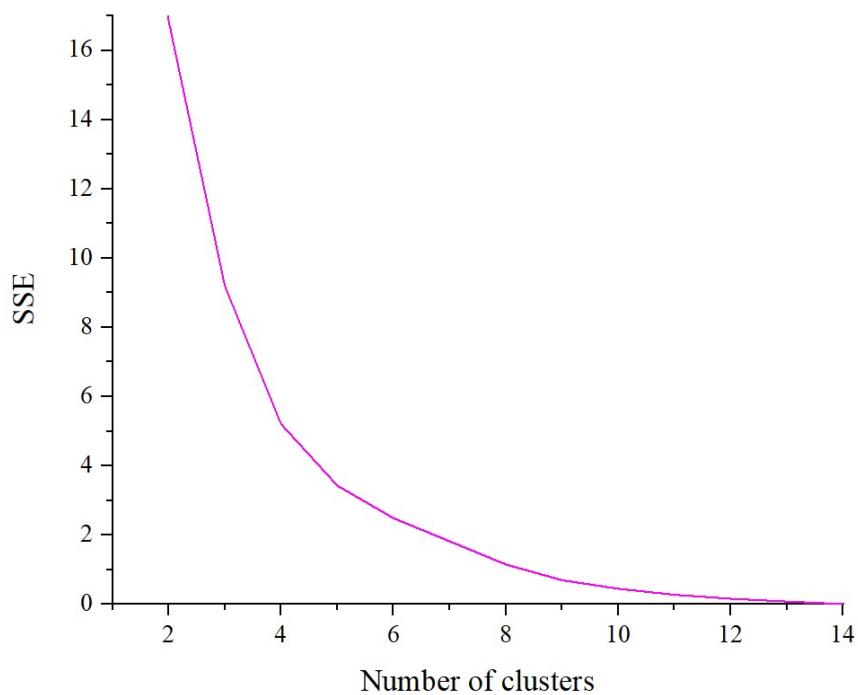

Figure S1. Dynamics of the sum of the squared error (SSE) reduction with increasing number of clusters

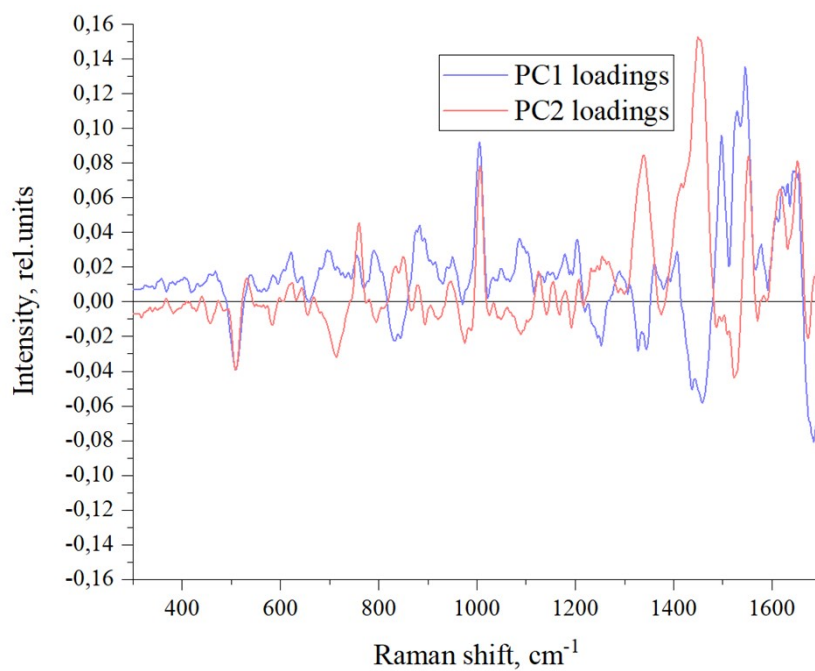

Figure S2. Loadings for PC1 and PC2 (for the PCA in Figure 2)

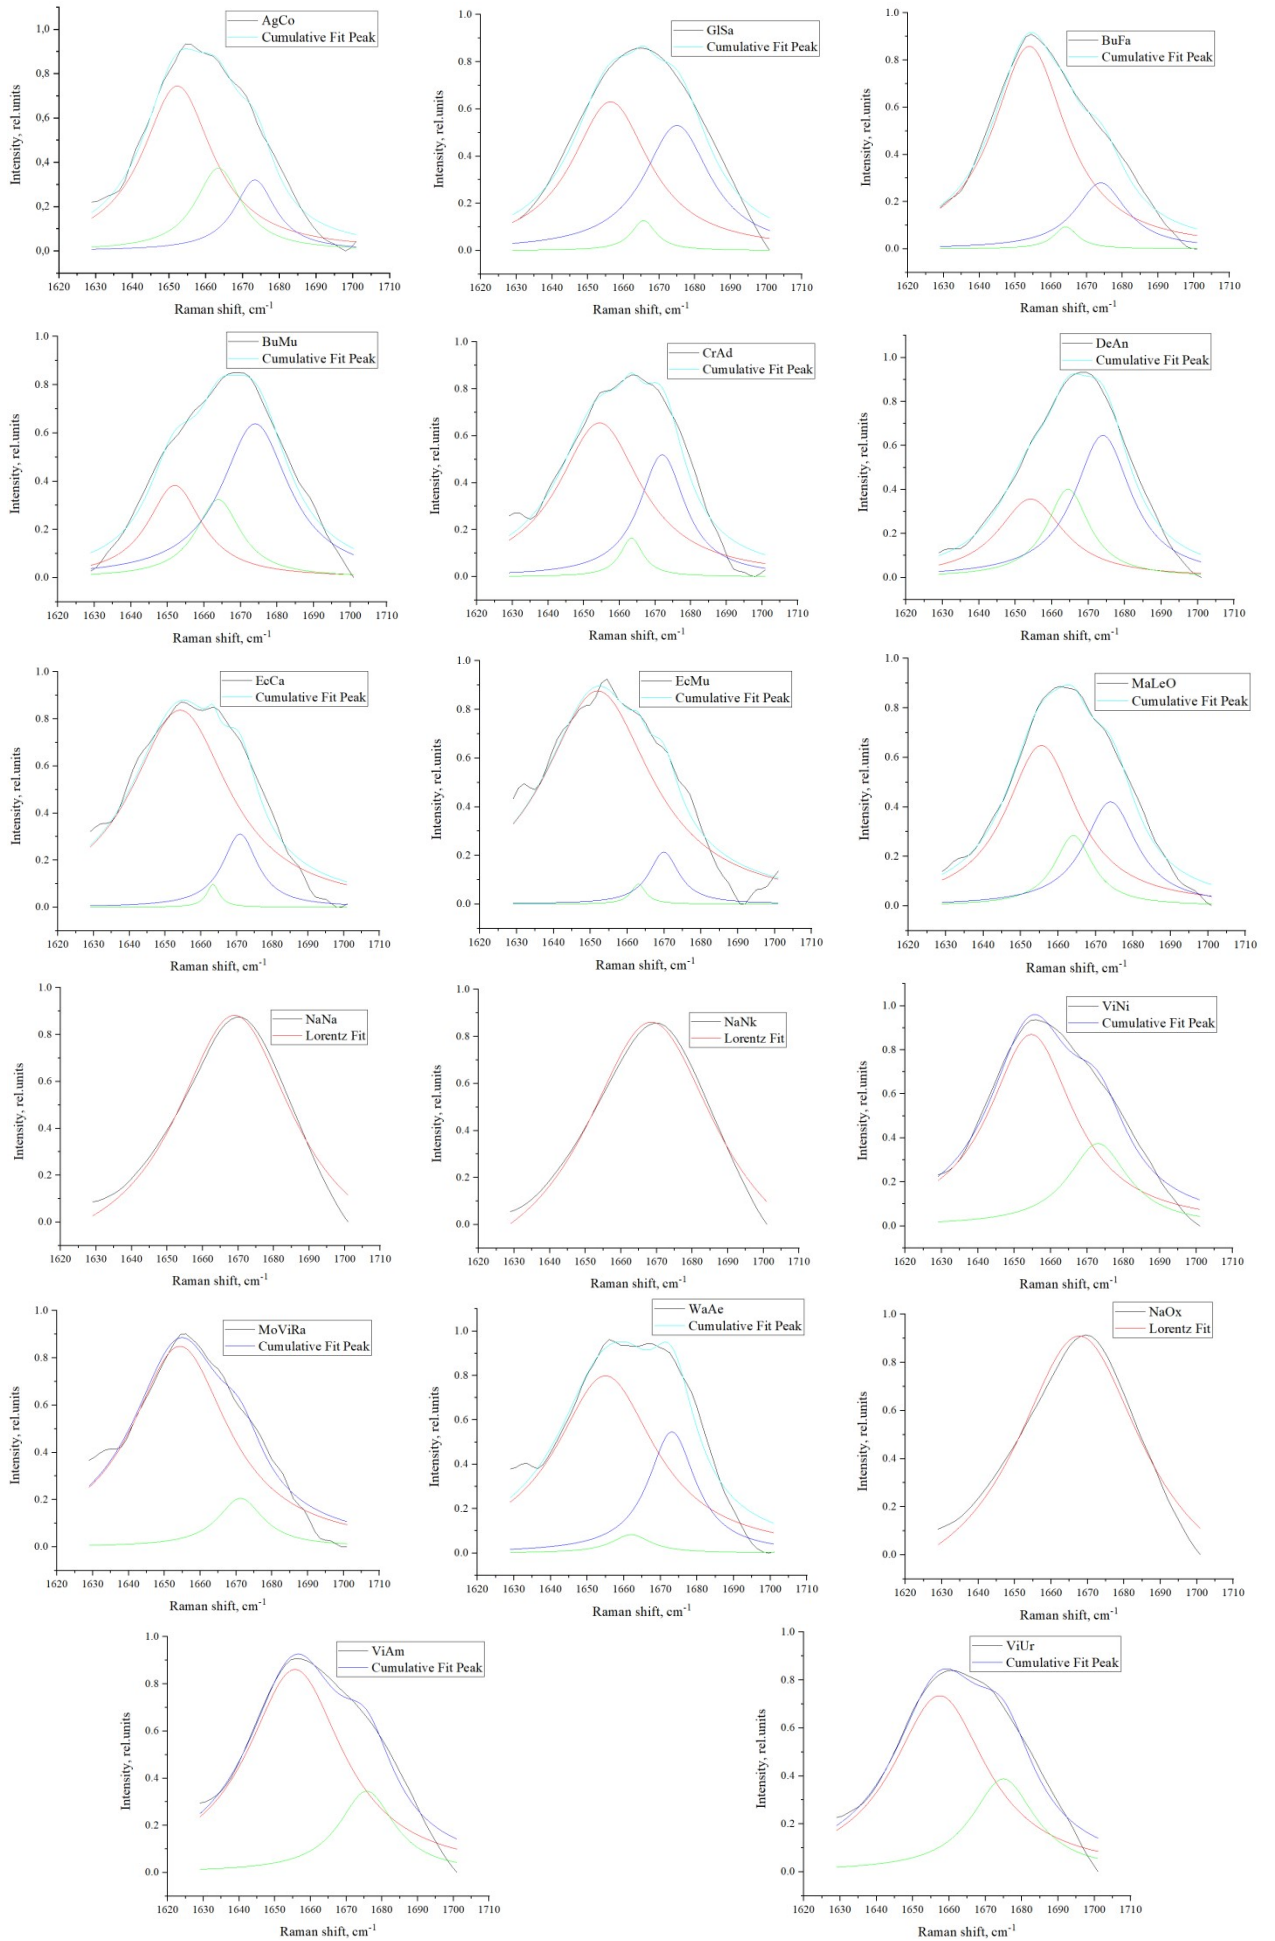

Figure S3. The graphical results of the curve-fitting analysis
